# Supplementary material for: Avian Tembusu virus infection effectively triggers host innate immune response through MDA5 and TLR3-dependent signaling pathways
Source: PubMed Central journal article supplement (PMC4957414; doi:10.1186/s13567-016-0358-5), 2016-07-22

**Spleen of chicken infected with ATMUV**

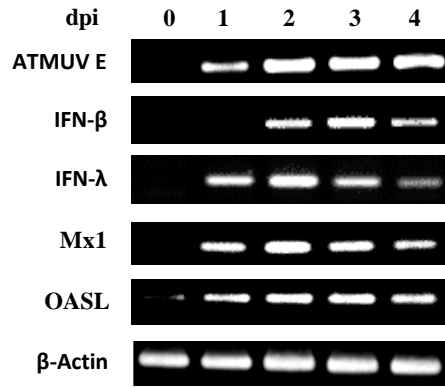

Supplement: 13567_2016_358_MOESM2_ESM.pdf [file 13567_2016_358_MOESM2_ESM.pdf]
