# Supplementary material for: Avian Tembusu virus infection effectively triggers host innate immune response through MDA5 and TLR3-dependent signaling pathways
Source: PubMed Central journal article supplement (PMC4957414; doi:10.1186/s13567-016-0358-5), 2016-07-22

|                    |   |   |   |   |
|--------------------|---|---|---|---|
| <b>ATMUV</b>       | - | - | + | + |
| <b>IPS-1-shRNA</b> | - | + | - | + |
| <b>Luc-shRNA</b>   | + | - | + | - |

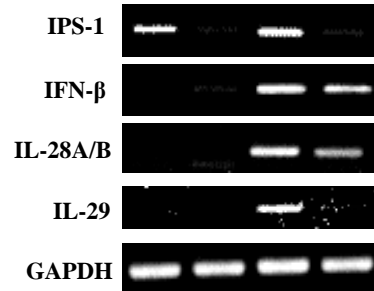

Supplement: 13567_2016_358_MOESM6_ESM.pdf [file 13567_2016_358_MOESM6_ESM.pdf]
