# Supplementary material for: Avian Tembusu virus infection effectively triggers host innate immune response through MDA5 and TLR3-dependent signaling pathways
Source: PubMed Central journal article supplement (PMC4957414; doi:10.1186/s13567-016-0358-5), 2016-07-22

**A**

|            |   |   |   |   |
|------------|---|---|---|---|
| ATMUV      | - | - | + | + |
| IRF3-shRNA | - | + | - | + |
| Luc-shRNA  | + | - | + | - |

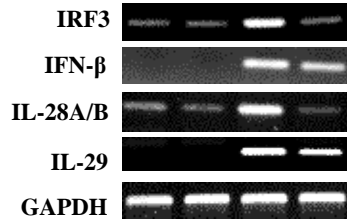**B**

|            |   |   |   |   |
|------------|---|---|---|---|
| ATMUV      | - | - | + | + |
| IRF7-shRNA | - | + | - | + |
| Luc-shRNA  | + | - | + | - |

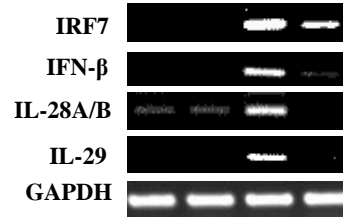**C**

|       |   |   |   |   |
|-------|---|---|---|---|
| ATMUV | - | - | + | + |
| Bay   | - | + | - | + |
| DMSO  | + | - | + | - |

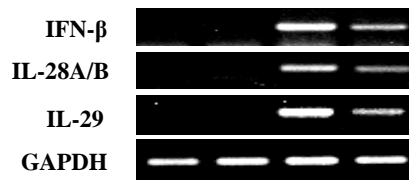

Supplement: 13567_2016_358_MOESM7_ESM.pdf [file 13567_2016_358_MOESM7_ESM.pdf]
